# Supplementary material for: A Diverse Array of Cancer-Associated MTOR Mutations Are Hyperactivating and Can Predict Rapamycin Sensitivity
Source: Oxford University Press journal article supplement (doi:10.1158/2159-8290.cd-13-0929), 2014-03-14
Supplement: 21598290cd130929-sup-tabe_s5.xlsx [file 21598290cd130929-sup-tabe_s5.xlsx]

## Sheet: Sheet1
Gene	Mutation	Codon	Primer	Primer Sequence (5' -> 3')
MTOR	A41P	41	TOP	AGGGCCAAAGCCCCCAAGGAGCTCC
MTOR	A41P	41	BOTTOM	GGAGCTCCTTGGGGGCTTTGGCCCT
MTOR	A41S	41	TOP	CCAGGGCCAAAGCCAGCAAGGAGCTCCAGC
MTOR	A41S	41	BOTTOM	GCTGGAGCTCCTTGCTGGCTTTGGCCCTGG
MTOR	A41T	41	TOP	CAGGGCCAAAGCCACCAAGGAGCTCCA
MTOR	A41T	41	BOTTOM	TGGAGCTCCTTGGTGGCTTTGGCCCTG
MTOR	R1208C	1208	TOP	CACCGAATCAATCATCAGTGCTATGATGTGCTCATCT
MTOR	R1208C	1208	BOTTOM	AGATGAGCACATCATAGCACTGATGATTGATTCGGTG
MTOR	A1428T	1428	TOP	CAGCAGCCGGAGACGGCGGCCGGAGTG
MTOR	A1428T	1428	BOTTOM	CACTCCGGCCGCCGTCTCCGGCTGCTG
MTOR	L1433S	1433	TOP	GGCAGCGGCCGGAGTGTCAGAATATGCCA
MTOR	L1433S	1433	BOTTOM	TGGCATATTCTGACACTCCGGCCGCTGCC
MTOR	K1452N	1452	TOP	CAGGCTACCTGGTATGAGAATCTGCACGAGTG
MTOR	K1452N	1452	BOTTOM	CACTCGTGCAGATTCTCATACCAGGTAGCCTG
MTOR	A1459P	1459	TOP	TGCACGAGTGGGAGGATCCCCTTGTGG
MTOR	A1459P	1459	BOTTOM	CCACAAGGGGATCCTCCCACTCGTGCA
MTOR	L1460P	1460	TOP	GTGGGAGGATGCCCCTGTGGCCTATGACA
MTOR	L1460P	1460	BOTTOM	TGTCATAGGCCACAGGGGCATCCTCCCAC
MTOR	Y1463S	1463	TOP	GAGGATGCCCTTGTGGCCAGTGACAAGAAAATGGACACC
MTOR	Y1463S	1463	BOTTOM	GGTGTCCATTTTCTTGTCACTGGCCACAAGGGCATCCTC
MTOR	C1483W	1483	TOP	CCGCATGCGCTGGCTCGAGGCCTTG
MTOR	C1483W	1483	BOTTOM	CAAGGCCTCGAGCCAGCGCATGCGG
MTOR	C1483R	1483	TOP	GCCGCATGCGCCGCCTCGAGGCC
MTOR	C1483R	1483	BOTTOM	GGCCTCGAGGCGGCGCATGCGGC
MTOR	C1483F	1483	TOP	GCCGCATGCGCTTCCTCGAGGCC
MTOR	C1483F	1483	BOTTOM	GGCCTCGAGGAAGCGCATGCGGC
MTOR	C1483Y	1483	TOP	GGCCGCATGCGCTATCTCGAGGCCTTGG
MTOR	C1483Y	1483	BOTTOM	CCAAGGCCTCGAGATAGCGCATGCGGCC
MTOR	E1485K	1485	TOP	ATGCGCTGCCTCAAGGCCTTGGGGG
MTOR	E1485K	1485	BOTTOM	CCCCCAAGGCCTTGAGGCAGCGCAT
MTOR	A1519T	1519	TOP	CGGATGGCTGCTGCAACTGCATGGGGTTTAG
MTOR	A1519T	1519	BOTTOM	CTAAACCCCATGCAGTTGCAGCAGCCATCCG
MTOR	E1799K	1799	TOP	GGGCAGTGATGAACTTCAAAGCTGTGCTACACTAC
MTOR	E1799K	1799	BOTTOM	GTAGTGTAGCACAGCTTTGAAGTTCATCACTGCCC
MTOR	F1888I	1888	TOP	CTGCCGTCCAGGGCATCTTCCGTTCCATC
MTOR	F1888I	1888	BOTTOM	GATGGAACGGAAGATGCCCTGGACGGCAG
MTOR	F1888L	1888	TOP	CCTGCCGTCCAGGGCTTATTCCGTTCCATC
MTOR	F1888L	1888	BOTTOM	GATGGAACGGAATAAGCCCTGGACGGCAGG
MTOR	F1888V	1888	TOP	CTGCCGTCCAGGGCGTCTTCCGTTCCATC
MTOR	F1888V	1888	BOTTOM	GATGGAACGGAAGACGCCCTGGACGGCAG
MTOR	I1973F	1973	TOP	GTCAGTGGGTAGAAGAGGGCCTGGGGG
MTOR	I1973F	1973	BOTTOM	CCCCCAGGCCCTCTTCTACCCACTGAC
MTOR	T1977K	1977	TOP	AGGCCCTCATCTACCCACTGAAAGTGGCTTCTA
MTOR	T1977K	1977	BOTTOM	TAGAAGCCACTTTCAGTGGGTAGATGAGGGCCT
MTOR	T1977R	1977	TOP	GCCCTCATCTACCCACTGAGAGTGGCTTCT
MTOR	T1977R	1977	BOTTOM	AGAAGCCACTCTCAGTGGGTAGATGAGGGC
MTOR	T1977S	1977	TOP	CCTCATCTACCCACTGTCAGTGGCTTCTAAGTC
MTOR	T1977S	1977	BOTTOM	GACTTAGAAGCCACTGACAGTGGGTAGATGAGG
MTOR	V2006I	2006	TOP	ACAGCAACACCCTGATCCAGCAGGCCATG
MTOR	V2006I	2006	BOTTOM	CATGGCCTGCTGGATCAGGGTGTTGCTGT
MTOR	V2006L	2006	TOP	CAGCAACACCCTGCTCCAGCAGGCCAT
MTOR	V2006L	2006	BOTTOM	ATGGCCTGCTGGAGCAGGGTGTTGCTG
MTOR	V2006F	2006	TOP	ACAGCAACACCCTGTTCCAGCAGGCCATG
MTOR	V2006F	2006	BOTTOM	CATGGCCTGCTGGAACAGGGTGTTGCTGT
MTOR	A2100T	2100	TOP	CAAGGACCTCACCCAAACCTGGGACCTCTAT
MTOR	A2100T	2100	BOTTOM	ATAGAGGTCCCAGGTTTGGGTGAGGTCCTTG
MTOR	R2134L	2134	TOP	AAAACTTCTGATGTGCCTGGACCTTGAATTGGCTG
MTOR	R2134L	2134	BOTTOM	CAGCCAATTCAAGGTCCAGGCACATCAGAAGTTTT
MTOR	R2152C	2152	TOP	GACCCCAACCAGCCAATCATTTGCATTCAGTCC
MTOR	R2152C	2152	BOTTOM	GGACTGAATGCAAATGATTGGCTGGTTGGGGTC
MTOR	L2172M	2172	TOP	AGCAGAGGCCCCGGAAAATGACACTTATGGG
MTOR	L2172M	2172	BOTTOM	CCCATAAGTGTCATTTTCCGGGGCCTCTGCT
MTOR	D2191H	2191	TOP	TTTCCTTCTAAAAGGCCATGAACATCTGCGCCAGG
MTOR	D2191H	2191	BOTTOM	CCTGGCGCAGATGTTCATGGCCTTTTAGAAGGAAA
MTOR	R2193C	2193	TOP	GGCCATGAAGATCTGTGCCAGGATGAGCGTG
MTOR	R2193C	2193	BOTTOM	CACGCTCATCCTGGCACAGATCTTCATGGCC
MTOR	N2206S	2206	TOP	GCTCTTCGGCCTGGTTAGCACCCTTCTGG
MTOR	N2206S	2206	BOTTOM	CCAGAAGGGTGCTAACCAGGCCGAAGAGC
MTOR	L2209V	2209	TOP	GGCCTGGTTAACACCCTTGTGGCCAATGAC
MTOR	L2209V	2209	BOTTOM	GTCATTGGCCACAAGGGTGTTAACCAGGCC
MTOR	A2210P	2210	TOP	GGTTAACACCCTTCTGCCCAATGACCCAACATC
MTOR	A2210P	2210	BOTTOM	GATGTTGGGTCATTGGGCAGAAGGGTGTTAACC
MTOR	P2213L	2213	TOP	CCTTCTGGCCAATGACCTAACATCTCTTCGGAAAA
MTOR	P2213L	2213	BOTTOM	TTTTCCGAAGAGATGTTAGGTCATTGGCCAGAAGG
MTOR	S2215Y	2215	TOP	CTGGCCAATGACCCAACATATCTTCGGAAAAACCTC
MTOR	S2215Y	2215	BOTTOM	GAGGTTTTTCCGAAGATATGTTGGGTCATTGGCCAG
MTOR	S2215P	2215	TOP	TGGCCAATGACCCAACACCTCTTCGGAAAAACCTC
MTOR	S2215P	2215	BOTTOM	GAGGTTTTTCCGAAGAGGTGTTGGGTCATTGGCCA
MTOR	S2215T	2215	TOP	TGGCCAATGACCCAACAACTCTTCGGAAAAACCTC
MTOR	S2215T	2215	BOTTOM	GAGGTTTTTCCGAAGAGTTGTTGGGTCATTGGCCA
MTOR	S2215F	2215	TOP	CTGGCCAATGACCCAACATTTCTTCGGAAAAACCTC
MTOR	S2215F	2215	BOTTOM	GAGGTTTTTCCGAAGAAATGTTGGGTCATTGGCCAG
MTOR	L2216P	2216	TOP	CAATGACCCAACATCTCCTCGGAAAAACCTCAGCA
MTOR	L2216P	2216	BOTTOM	TGCTGAGGTTTTTCCGAGGAGATGTTGGGTCATTG
MTOR	R2217W	2217	TOP	CCAATGACCCAACATCTCTTTGGAAAAACCTCAGC
MTOR	R2217W	2217	BOTTOM	GCTGAGGTTTTTCCAAAGAGATGTTGGGTCATTGG
MTOR	L2220F	2220	TOP	AACATCTCTTCGGAAAAACTTCAGCATCCAGAGATACG
MTOR	L2220F	2220	BOTTOM	CGTATCTCTGGATGCTGAAGTTTTTCCGAAGAGATGTT
MTOR	Q2223K	2223	TOP	GGAAAAACCTCAGCATCAAGAGATACGCTGTCATC
MTOR	Q2223K	2223	BOTTOM	GATGACAGCGTATCTCTTGATGCTGAGGTTTTTCC
MTOR	A2226S	2226	TOP	CCTCAGCATCCAGAGATACAGTGTCATCCCTTTATCGACC
MTOR	A2226S	2226	BOTTOM	GGTCGATAAAGGGATGACACTGTATCTCTGGATGCTGAGG
MTOR	I2228T	2228	TOP	CAGCATCCAGAGATACGCTGTCACCCCTTTATCGAC
MTOR	I2228T	2228	BOTTOM	GTCGATAAAGGGGTGACAGCGTATCTCTGGATGCTG
MTOR	L2230V	2230	TOP	ATACGCTGTCATCCCTGTATCGACCAACTCGGG
MTOR	L2230V	2230	BOTTOM	CCCGAGTTGGTCGATACAGGGATGACAGCGTAT
MTOR	S2231W	2231	TOP	CGCTGTCATCCCTTTATGGACCAACTCGGGC
MTOR	S2231W	2231	BOTTOM	GCCCGAGTTGGTCCATAAAGGGATGACAGCG
MTOR	T2232I	2232	TOP	TGTCATCCCTTTATCGATCAACTCGGGCCTCATTG
MTOR	T2232I	2232	BOTTOM	CAATGAGGCCCGAGTTGATCGATAAAGGGATGACA
MTOR	L2236H	2236	TOP	GACCAACTCGGGCCACATTGGCTGGGTTC
MTOR	L2236H	2236	BOTTOM	GAACCCAGCCAATGTGGCCCGAGTTGGTC
MTOR	G2238D	2238	TOP	TCGGGCCTCATTGACTGGGTTCCCCAC
MTOR	G2238D	2238	BOTTOM	GTGGGGAACCCAGTCAATGAGGCCCGA
MTOR	L2334V	2334	TOP	CATGTCAATGGTTGGGTATATTGTAGGCCTGGGAG
MTOR	L2334V	2334	BOTTOM	CTCCCAGGCCTACAATATACCCAACCATTGACATG
MTOR	R2430M	2430	TOP	CCCCTTGCTGAACTGGATGCTGATGGACACAAA
MTOR	R2430M	2430	BOTTOM	TTTGTGTCCATCAGCATCCAGTTCAGCAAGGGG
MTOR	L2431P	2431	TOP	cttgctgaactggaggccgatggacacaaatacca
MTOR	L2431P	2431	BOTTOM	tggtatttgtgtccatcggcctccagttcagcaag
MTOR	I2500F	2500	TOP	CCCTAAATAAGAAAGCTATCCAGTTTATTAACAGGGTTCGAGATAAG
MTOR	I2500F	2500	BOTTOM	CTTATCTCGAACCCTGTTAATAAACTGGATAGCTTTCTTATTTAGGG
MTOR	I2500M	2500	TOP	CTAAATAAGAAAGCTATCCAGATGATTAACAGGGTTCGAGATAAGCT
MTOR	I2500M	2500	BOTTOM	AGCTTATCTCGAACCCTGTTAATCATCTGGATAGCTTTCTTATTTAG
MTOR	R2505Q	2505	TOP	CAGATTATTAACAGGGTTCAAGATAAGCTCACTGGTCGG
MTOR	R2505Q	2505	BOTTOM	CCGACCAGTGAGCTTATCTTGAACCCTGTTAATAATCTG
MTOR	R2505*	2505	TOP	CCAGATTATTAACAGGGTTTGAGATAAGCTCACTGGTC
MTOR	R2505*	2505	BOTTOM	GACCAGTGAGCTTATCTCAAACCCTGTTAATAATCTGG
MTOR	R2505P	2505	TOP	AGATTATTAACAGGGTTCCAGATAAGCTCACTGGTCG
MTOR	R2505P	2505	BOTTOM	CGACCAGTGAGCTTATCTGGAACCCTGTTAATAATCT
MTOR	D2512G	2512	TOP	AAGCTCACTGGTCGGGGCTTCTCTCATGATGAC
MTOR	D2512G	2512	BOTTOM	GTCATCATGAGAGAAGCCCCGACCAGTGAGCTT
MTOR	D2512H	2512	TOP	ATAAGCTCACTGGTCGGCACTTCTCTCATGATGAC
MTOR	D2512H	2512	BOTTOM	GTCATCATGAGAGAAGTGCCGACCAGTGAGCTTAT
MTOR	D2512Y	2512	TOP	GAGATAAGCTCACTGGTCGGTATTTCTCTCATGATGACACTTT
MTOR	D2512Y	2512	BOTTOM	AAAGTGTCATCATGAGAGAAATACCGACCAGTGAGCTTATCTC
RHEB	Y35N	35	TOP	GCCAATTTGTGGACTCCAACGATCCAACCATAGAA
RHEB	Y35N	35	BOTTOM	TTCTATGGTTGGATCGTTGGAGTCCACAAATTGGC
RHEB	Y35H	35	TOP	gccaatttgtggactcccacgatccaaccatagaa
RHEB	Y35H	35	BOTTOM	ttctatggttggatcgtgggagtccacaaattggc
RHEB	Y35C	35	TOP	gccaatttgtggactcctgcgatccaaccataga
RHEB	Y35C	35	BOTTOM	tctatggttggatcgcaggagtccacaaattggc
RHEB	E139D	139	TOP	aagaagggaaagctttggcagattcttggaatgcag
RHEB	E139D	139	BOTTOM	ctgcattccaagaatctgccaaagctttcccttctt
RHEB	E139G	139	TOP	agggaaagctttggcaggatcttggaatgcagctt
RHEB	E139G	139	BOTTOM	aagctgcattccaagatcctgccaaagctttccct
RHEB	E139K	139	TOP	gaagggaaagctttggcaaaatcttggaatgcagctt
RHEB	E139K	139	BOTTOM	aagctgcattccaagattttgccaaagctttcccttc
RHEB	E139*	139	TOP	gaagggaaagctttggcataatcttggaatgcagctt
RHEB	E139*	139	BOTTOM	aagctgcattccaagattatgccaaagctttcccttc
