# Supplementary material for: A Diverse Array of Cancer-Associated MTOR Mutations Are Hyperactivating and Can Predict Rapamycin Sensitivity
Source: Oxford University Press journal article supplement (doi:10.1158/2159-8290.cd-13-0929), 2014-03-14
Supplement: 21598290cd130929-sup-table_s1.xlsx [file 21598290cd130929-sup-table_s1.xlsx]

## Sheet: All mTOR Pathway Genes
SYMBOL	ALT NAME	NCBI GENE ID	GENE NAME	SYNONYM(S)	REFSEQ GENE(S)	REFSEQ PROTEIN(S)	UNIGENE ID(S)	GENE ONTOLOGY DESCRIPTION(S)
MTOR		2475	mechanistic target of rapamycin (serine/threonine kinase)	FRAP|FRAP1|FRAP2|RAFT1|RAPT1	XM_005263438;XM_005263439;XM_005263440;XM_005263441;XR_244786;NM_004958	XP_005263495;XP_005263496;XP_005263497;XP_005263498;-;NP_004949	Hs.338207	Golgi membrane;RNA polymerase III type 1 promoter DNA binding;RNA polymerase III type 2 promoter DNA binding;RNA polymerase III type 3 promoter DNA binding;TFIIIC-class transcription factor binding;positive regulation of protein phosphorylation;positive regulation of endothelial cell proliferation;protein serine/threonine kinase activity;protein binding;ATP binding;cytoplasm;mitochondrial outer m…
RPTOR	RAPTOR	57521	regulatory associated protein of MTOR, complex 1	KOG1|Mip1	XM_005257539;XM_005257540;XM_005257541;NM_001163034;NM_020761	XP_005257596;XP_005257597;XP_005257598;NP_001156506;NP_065812	Hs.133044	RNA polymerase III type 1 promoter DNA binding;RNA polymerase III type 2 promoter DNA binding;RNA polymerase III type 3 promoter DNA binding;TFIIIC-class transcription factor binding;protein binding;cytoplasm;lysosome;lysosomal membrane;cytosol;cell cycle arrest;insulin receptor signaling pathway;regulation of cell size;cell growth;protein kinase binding;cellular response to nutrient levels;TOR s…
RICTOR		253260	RPTOR independent companion of MTOR, complex 2	AVO3|PIA|hAVO3	XM_005248277;XM_005248278;XM_005248279;NM_001285439;NM_001285440;NM_152756	XP_005248334;XP_005248335;XP_005248336;NP_001272368;NP_001272369;NP_689969	Hs.407926	protein binding;cytosol;epidermal growth factor receptor signaling pathway;fibroblast growth factor receptor signaling pathway;embryo development;regulation of cell migration;positive regulation of actin filament polymerization;T cell costimulation;actin cytoskeleton reorganization;TOR signaling cascade;TORC2 complex;positive regulation of TOR signaling cascade;regulation of Rac GTPase activity;r…
TSC1		7248	tuberous sclerosis 1	LAM|TSC	XM_005272211;XM_005272212;NM_000368;NM_001162426;NM_001162427;NM_001008567	XP_005272268;XP_005272269;NP_000359;NP_001155898;NP_001155899;-	Hs.370854	kidney development;neural tube closure;regulation of cell-matrix adhesion;protein binding;cytoplasm;cytosol;actin filament;cell cortex;rRNA export from nucleus;regulation of translation;potassium ion transport;cell cycle arrest;negative regulation of cell proliferation;insulin receptor signaling pathway;membrane;negative regulation of translation;hippocampus development;cerebral cortex developmen…
TSC2		7249	tuberous sclerosis 2	LAM|TSC4	XM_005255527;XM_005255528;XM_005255529;XM_005255530;XM_005255531;XM_005255532;XM_005255533;XM_005255534;XR_243299;NM_000548;NM_001077183;NM_001114382;NM_021055;NM_021056	XP_005255584;XP_005255585;XP_005255586;XP_005255587;XP_005255588;XP_005255589;XP_005255590;XP_005255591;-;NP_000539;NP_001070651;NP_001107854	Hs.90303	response to hypoxia;neural tube closure;GTPase activator activity;protein binding;nucleus;cytoplasm;Golgi apparatus;cytosol;caveola;negative regulation of protein kinase activity;protein import into nucleus;endocytosis;acute-phase response;cell cycle arrest;epidermal growth factor receptor signaling pathway;heart development;protein localization;negative regulation of cell proliferation;insulin r…
RHEB		6009	Ras homolog enriched in brain	RHEB2	XM_005250034;NM_005614	XP_005250091;NP_005605	Hs.283521;Hs.568850;Hs.647068	GTPase activity;protein binding;GTP binding;spliceosomal complex;cytosol;plasma membrane;cell cycle arrest;signal transduction;small GTPase mediated signal transduction;insulin receptor signaling pathway;GDP binding;protein kinase binding;dendrite;positive regulation of TOR signaling cascade;neuronal cell body;metal ion binding
RHEBL1		121268	Ras homolog enriched in brain like 1	RHEBL1c	XM_005268634;NM_144593	XP_005268691;NP_653194	Hs.159013	GTPase activity;GTP binding;cytoplasm;plasma membrane;small GTPase mediated signal transduction;TOR signaling cascade;positive regulation of NF-kappaB transcription factor activity
PRR5	PROTOR1	55615	proline rich 5 (renal)	FLJ20185k|PP610|PROTOR-1|PROTOR1	XM_005261672;XM_005261673;XM_005261674;XM_005261675;XR_244381;NM_001017528;NM_001017529;NM_001017530;NM_001198721;NM_015366;NM_181333	XP_005261729;XP_005261730;XP_005261731;XP_005261732;-;NP_001017528;NP_001017529;NP_001017530;NP_001185650;NP_056181;NP_851850	Hs.102336	cell cycle;TORC2 complex
PRR5L	PROTOR2	79899	proline rich 5 like	PROTOR2	XM_005253142;XM_005253143;XM_005253144;NM_001160167;NM_001160168;NM_001160169;NM_024841	XP_005253199;XP_005253200;XP_005253201;NP_001153639;NP_001153640;NP_001153641;NP_079117	Hs.19987	negative regulation of protein phosphorylation;mitochondrion;regulation of fibroblast migration;ubiquitin protein ligase binding;TOR signaling cascade;TORC2 complex
DEPTOR		64798	DEP domain containing MTOR-interacting protein	DEP.6|DEPDC6	XM_005251022;NM_001283012;NM_022783	XP_005251079;NP_001269941;NP_073620	Hs.112981	protein binding;intracellular;negative regulation of protein kinase activity;negative regulation of TOR signaling cascade;intracellular signal transduction;negative regulation of cell size;regulation of extrinsic apoptotic signaling pathway
TBC1D7		51256	TBC1 domain family, member 7	PIG51|TBC7|dJ257A7.3	XM_005249163;XM_005249164;XM_005249165;XM_005249166;XM_005249167;XM_005249168;XR_241903;NM_001143964;NM_001143965;NM_001143966;NM_001258457;NM_016495	XP_005249220;XP_005249221;XP_005249222;XP_005249223;XP_005249224;XP_005249225;-;NP_001137436;NP_001137437;NP_001137438;NP_001245386;NP_057579	Hs.484678	Rab GTPase activator activity;protein binding;cytoplasmic membrane-bounded vesicle;positive regulation of protein ubiquitination;cytoplasmic vesicle;negative regulation of TOR signaling cascade;activation of Rho GTPase activity;response to growth factor stimulus
MAPKAP1		79109	mitogen-activated protein kinase associated protein 1	JC310|MIP1|SIN1|SIN1b|SIN1g	XM_005252203;XM_005252204;NM_001006617;NM_001006618;NM_001006619;NM_001006620;NM_001006621;NM_024117	XP_005252260;XP_005252261;NP_001006618;NP_001006619;NP_001006620;NP_001006621;NP_001006622;NP_077022	Hs.495138	phosphatidylinositol-4,5-bisphosphate binding;phosphatidylinositol-3,4,5-trisphosphate binding;nucleus;Golgi apparatus;cytosol;plasma membrane;epidermal growth factor receptor signaling pathway;fibroblast growth factor receptor signaling pathway;cytoplasmic membrane-bounded vesicle;Ras GTPase binding;T cell costimulation;Fc-epsilon receptor signaling pathway;phosphatidylinositol-3,4-bisphosphate …
AKT1S1		84335	AKT1 substrate 1 (proline-rich)	Lobe|PRAS40	NM_001098632;NM_001098633;NM_001278159;NM_001278160;NM_032375	NP_001092102;NP_001092103;NP_001265088;NP_001265089;NP_115751	Hs.515542;Hs.610819	protein binding;cytosol;negative regulation of protein kinase activity;epidermal growth factor receptor signaling pathway;fibroblast growth factor receptor signaling pathway;TORC1 complex;negative regulation of TOR signaling cascade;Fc-epsilon receptor signaling pathway;regulation of neuron apoptotic process;innate immune response;negative regulation of cell size;neurotrophin TRK receptor signali…
MLST8		64223	MTOR associated protein, LST8 homolog (S. cerevisiae)	GBL|GbetaL|LST8|POP3|WAT1	XM_005255475;XM_005255476;XM_005255477;XM_005255478;XM_005255479;XM_005255480;XM_005255481;XM_005255482;XM_005255483;XR_243294;XR_243295;XR_243296;NM_001199173;NM_001199174;NM_001199175;NM_022372	XP_005255532;XP_005255533;XP_005255534;XP_005255535;XP_005255536;XP_005255537;XP_005255538;XP_005255539;XP_005255540;-;NP_001186102;NP_001186103;NP_001186104;NP_071767	Hs.29203	protein binding;cytoplasm;cytosol;epidermal growth factor receptor signaling pathway;insulin receptor signaling pathway;fibroblast growth factor receptor signaling pathway;positive regulation of actin filament polymerization;T cell costimulation;positive regulation of TOR signaling cascade;regulation of Rac GTPase activity;regulation of actin cytoskeleton organization;Fc-epsilon receptor signalin…
DEPDC5		9681	DEP domain containing 5	DEP.5|FFEVF	XM_005261862;XM_005261863;XM_005261864;XM_005261865;XM_005261866;XM_005261867;XR_244404;XR_244405;NM_001007188;NM_001136029;NM_001242896;NM_001242897;NM_014662	XP_005261919;XP_005261920;XP_005261921;XP_005261922;XP_005261923;XP_005261924;-;NP_001007189;NP_001129501;NP_001229825;NP_001229826;NP_055477	Hs.435022	GTPase activator activity;lysosomal membrane;cytosol;intracellular signal transduction;perinuclear region of cytoplasm
NPRL2		10641	nitrogen permease regulator-like 2 (S. cerevisiae)	NPR2|NPR2L|TUSC4	XM_005264806;XM_005264807;XM_005264808;NM_006545	XP_005264863;XP_005264864;XP_005264865;NP_006536	Hs.437083	protein kinase activity;GTPase activator activity;protein binding;cytoplasm;protein phosphorylation;negative regulation of kinase activity
NPRL3		8131	nitrogen permease regulator-like 3 (S. cerevisiae)	C16orf35|CGTHBA|HS-40|MARE|NPR3|RMD11	NM_001039476;NM_001077350;NM_001243247;NM_001243248;NM_001243249;NM_012075	NP_001034565;NP_001070818;NP_001230176;NP_001230177;NP_001230178;-	Hs.19699	molecular_function;GTPase activator activity;cellular_component;biological_process
WDR24		84219	WD repeat domain 24	C16orf21|JFP7	XM_005255626;NM_032259	XP_005255683;NP_115635	Hs.459632
WDR59		79726	WD repeat domain 59	-	XM_005256146;XM_005256147;NM_030581	XP_005256203;XP_005256204;NP_085058	Hs.280951	molecular_function;cellular_component;biological_process
MIOS		54468	missing oocyte, meiosis regulator, homolog (Drosophila)	-	XM_005249780;XM_005249781;XM_005249782;XM_005249783;XM_005249784;NM_019005	XP_005249837;XP_005249838;XP_005249839;XP_005249840;XP_005249841;NP_061878	Hs.520215	lysosomal membrane
SEH1L		81929	SEH1-like (S. cerevisiae)	SEC13L|SEH1A|SEH1B|Seh1	XM_005258152;XM_005258153;NM_001013437;NM_031216	XP_005258209;XP_005258210;NP_001013455;NP_112493	Hs.301048	mitotic cell cycle;kinetochore;condensed chromosome kinetochore;nuclear envelope;cytosol;carbohydrate metabolic process;nuclear pore organization;mitotic nuclear envelope disassembly;mitotic metaphase plate congression;hexose transport;regulation of glucose transport;protein transport;viral process;cytokine-mediated signaling pathway;nuclear pore outer ring;small molecule metabolic process;mRNA t…
SEC13		6396	SEC13 homolog (S. cerevisiae)	D3S1231E|SEC13L1|SEC13R|npp-20	XM_005265377;XM_005265378;XM_005265379;NM_001136026;NM_001136232;NM_001278946;NM_030673;NM_183352	XP_005265434;XP_005265435;XP_005265436;NP_001129498;NP_001129704;NP_001265875;NP_109598;NP_899195	Hs.166924	mitotic cell cycle;kinetochore;antigen processing and presentation of peptide antigen via MHC class I;protein binding;nuclear envelope;endoplasmic reticulum membrane;cytosol;intracellular protein transport;ER to Golgi vesicle-mediated transport;ER to Golgi transport vesicle membrane;protein N-linked glycosylation via asparagine;antigen processing and presentation of exogenous peptide antigen via …
LAMTOR1		55004	late endosomal/lysosomal adaptor, MAPK and MTOR activator 1	C11orf59|PDRO|Ragulator1|p18|p27RF-Rho	XM_005274076;NM_017907	XP_005274133;NP_060377	Hs.731528	regulation of receptor recycling;guanyl-nucleotide exchange factor activity;protein binding;lysosome;lysosomal membrane;Golgi apparatus;plasma membrane;endosome organization;lysosome organization;regulation of cholesterol esterification;regulation of cholesterol efflux;cell growth;late endosome membrane;positive regulation of TOR signaling cascade;lysosome localization;endosome localization;prote…
LAMTOR2		28956	late endosomal/lysosomal adaptor, MAPK and MTOR activator 2	ENDAP|HSPC003|MAPBPIP|MAPKSP1AP|ROBLD3|Ragulator2|p14	NM_001145264;NM_014017	NP_001138736;NP_054736	Hs.632483	activation of MAPKK activity;guanyl-nucleotide exchange factor activity;protein binding;lysosomal membrane;late endosome;cell growth;positive regulation of TOR signaling cascade;protein complex scaffold;cellular protein localization;cellular response to amino acid stimulus;Ragulator complex
LAMTOR3		8649	late endosomal/lysosomal adaptor, MAPK and MTOR activator 3	MAP2K1IP1|MAPBP|MAPKSP1|MP1|PRO0633|Ragulator3	NM_001243736;NM_021970;NR_024170	NP_001230665;NP_068805;-	Hs.433332	guanyl-nucleotide exchange factor activity;protein binding;positive regulation of TOR signaling cascade;protein complex scaffold;cellular protein localization;cellular response to amino acid stimulus;Ragulator complex
LAMTOR4		389541	late endosomal/lysosomal adaptor, MAPK and MTOR activator 4	C7orf59	NM_001008395	NP_001008396	Hs.406520	guanyl-nucleotide exchange factor activity;lysosome;regulation of cell size;positive regulation of TOR signaling cascade;protein complex scaffold;protein localization to lysosome;cellular response to amino acid stimulus;Ragulator complex
LAMTOR5		10542	late endosomal/lysosomal adaptor, MAPK and MTOR activator 5	HBXIP|XIP	NM_006402	NP_006393	Hs.439815	guanyl-nucleotide exchange factor activity;protein binding;cytoplasm;lysosome;cytosol;regulation of cell size;response to virus;viral genome replication;positive regulation of TOR signaling cascade;protein complex scaffold;negative regulation of apoptotic process;negative regulation of cysteine-type endopeptidase activity involved in apoptotic process;protein localization to lysosome;cellular res…
RRAGA		10670	Ras-related GTP binding A	FIP-1|FIP1|RAGA	NM_006570	NP_006561	Hs.743260	protein binding;GTP binding;nucleus;cytoplasm;lysosome;lysosomal membrane;Golgi apparatus;apoptotic process;cell death;modulation by virus of host morphology or physiology;positive regulation of TOR signaling cascade;cellular protein localization;protein homodimerization activity;intracellular membrane-bounded organelle;positive regulation of cytolysis;protein heterodimerization activity;phosphop…
RRAGB		10325	Ras-related GTP binding B	RAGB|bA465E19.1	XM_005261973;XM_005261974;XM_005261975;XR_244464;XR_244465;NM_006064;NM_016656	XP_005262030;XP_005262031;XP_005262032;-;NP_006055;NP_057740	Hs.50282	protein binding;GTP binding;nucleus;cytoplasm;lysosome;lysosomal membrane;Golgi apparatus;positive regulation of TOR signaling cascade;guanyl ribonucleotide binding;cellular protein localization;intracellular membrane-bounded organelle;cellular response to amino acid stimulus
RRAGC		64121	Ras-related GTP binding C	GTR2|RAGC|TIB929	NM_001271851;NM_022157	NP_001258780;NP_071440	Hs.532461	magnesium ion binding;GTPase activity;protein binding;GTP binding;nucleus;cytoplasm;lysosome;GTP catabolic process;transcription, DNA-dependent;apoptotic process;small GTPase mediated signal transduction;RNA splicing;cell growth;GDP binding;cellular protein localization;protein heterodimerization activity;cellular response to amino acid stimulus
RRAGD		58528	Ras-related GTP binding D	RAGD|bA11D8.2.1	XM_005248755;NM_021244	XP_005248812;NP_067067	Hs.31712	protein binding;GTP binding;nucleus;cytoplasm;lysosome;positive regulation of TOR signaling cascade;cellular protein localization;protein heterodimerization activity;cellular response to amino acid stimulus

## Sheet: AKT1S1
Gene	Sample ID	Mutation	Residue	Tissue	Source
AKT1S1	LUAD-S01345	E7K	7	lung	COSMIC
AKT1S1	TCGA-AA-3867	R51*	51	coadread_tcga_mutations	CBIO
AKT1S1	ESO-164	E104K	104	oesophagus	COSMIC
AKT1S1	TCGA-D5-6927-01	F143fs*14	143	large_intestine	COSMIC
AKT1S1	TCGA-78-7146-01	E149K	149	lung	COSMIC
AKT1S1	TCGA-DA-A1IA	D153_splice	153	skcm_tcga_mutations	CBIO
AKT1S1	TCGA-AA-3672	G163A	163	coadread_tcga_mutations	CBIO
AKT1S1	TCGA-AG-3882	P165fs	165	coadread_tcga_mutations	CBIO
AKT1S1	TCGA-A6-5665-01	T166fs*87	166	large_intestine	COSMIC
AKT1S1	TCGA-91-6848-01	Y180C	180	lung	COSMIC
AKT1S1	TCGA-AD-6889-01	A200V	200	large_intestine	COSMIC
AKT1S1	TCGA-33-4533	S212L	212	lusc_tcga_mutations	CBIO

## Sheet: DEPTOR
Gene	Sample ID	Mutation	Residue	Tissue	Source
DEPTOR	cSCCP7	E26G	26	skin	cosmic
DEPTOR	TCGA-D1-A103	R29C	29	Uterine (TCGA PUB)	cbio
DEPTOR	TCGA-BR-4201	A31T	31	stad_tcga_mutations	cbio
DEPTOR	TCGA-25-2409	T36S	36	ov_tcga_mutations	cbio
DEPTOR	587284	R54C	54	Colorectal (GENENTECH)	cbio
DEPTOR	TCGA-AA-3977	E68*	68	coadread_tcga_mutations	cbio
DEPTOR	TCGA-21-5786	E75V	75	lusc_tcga_mutations	cbio
DEPTOR	TCGA-AA-3542	I98M	98	coadread_tcga_mutations	cbio
DEPTOR	LUAD-YINHD	K109N	109	Lung adeno (BROAD)	cbio
DEPTOR	TCGA-D7-8576	F124L	124	Stomach (TCGA)	cbio
DEPTOR	TCGA-CV-7177	E147fs	147	hnsc_tcga_mutations	cbio
DEPTOR	TCGA-66-2758	Y161F	161	lusc_tcga_mutations	cbio
DEPTOR	587376	R163C	163	Colorectal (GENENTECH)	cbio
DEPTOR	TCGA-CG-5721	T164A	164	stad_tcga_mutations	cbio
DEPTOR	CRC-4	V175G	175	large_intestine	cosmic
DEPTOR	TCGA-HD-7754	Q176K	176	hnsc_tcga_mutations	cbio
DEPTOR	TCGA-17-Z031	A180S	180	luad_tcga_mutations	cbio
DEPTOR	TCGA-24-2289	C190Y	190	ov_tcga_mutations	cbio
DEPTOR	TCGA-41-5651	V202_splice	202	gbm_tcga_mutations	cbio
DEPTOR	TCGA-BR-4184	R225*	225	stad_tcga_mutations	cbio
DEPTOR	TCGA-FS-A1Z0	R225Q	225	skcm_tcga_mutations	cbio
DEPTOR	TCGA-BR-A4QL	E233fs	233	Stomach (TCGA)	cbio
DEPTOR	134430	P245A	245	lung	cosmic
DEPTOR	LUAD-B00859	262_262M>IK	262	Lung adeno (BROAD)	cbio
DEPTOR	TCGA-GN-A266	F290I	290	skcm_tcga_mutations	cbio
DEPTOR	TCGA-75-5125	V309_splice	309	luad_tcga_mutations	cbio
DEPTOR	TCGA-05-4402	P322S	322	luad_tcga_mutations	cbio
DEPTOR	TCGA-EE-A2GC	P325L	325	skcm_tcga_mutations	cbio
DEPTOR	TCGA-AA-3984	K329N	329	coadread_tcga_mutations	cbio
DEPTOR	TCGA-CZ-5467	K329N	329	kirc_tcga_mutations	cbio
DEPTOR	TCGA-D1-A16Y	A337V	337	Uterine (TCGA PUB)	cbio
DEPTOR	TCGA-BR-7851	R345Q	345	Stomach (TCGA)	cbio
DEPTOR	587332	A364V	364	Colorectal (GENENTECH)	cbio
DEPTOR	1604875	G365R	365	upper_aerodigestive_tract	cosmic
DEPTOR	TCGA-09-2049	V368_splice	368	ov_tcga_mutations	cbio
DEPTOR	TCGA-AP-A051	V380A	380	Uterine (TCGA PUB)	cbio
DEPTOR	TCGA-CG-5721	Y385C	385	stad_tcga_mutations	cbio

## Sheet: GATOR1
Gene	Sample ID	Mutation	Residue	Tissue	Source
DEPDC5	P04-2599	T3I	3	prostate	COSMIC
DEPDC5	TCGA-B5-A0JY	D20_splice	20	ucec_tcga_mutations	CBIO
DEPDC5	TCGA-BB-7863	V29M	29	hnsc_tcga_mutations	CBIO
DEPDC5	TCGA-AA-3819	Q63R	63	coadread_tcga_mutations	CBIO
DEPDC5	HN_63080	Q83*	83	upper_aerodigestive_tract	COSMIC
DEPDC5	TCGA-B2-5641	V85A	85	kirc_tcga_mutations	CBIO
DEPDC5	TCGA-AP-A0LM	V87A	87	ucec_tcga_mutations	CBIO
DEPDC5	TCGA-23-1032	Q107*	107	ov_tcga_mutations	CBIO
DEPDC5	PD4084a	Q176K	176	breast	COSMIC
DEPDC5	TCGA-D1-A103	N211D	211	ucec_tcga_mutations	CBIO
DEPDC5	TCGA-BP-4976	V218A	218	kirc_tcga_mutations	CBIO
DEPDC5	TCGA-BH-A1F5	Y226N	226	brca_tcga_mutations	CBIO
DEPDC5	TCGA-AG-A002	R243*	243	coadread_tcga_mutations	CBIO
DEPDC5	TCGA-B5-A11E	Q244H	244	ucec_tcga_mutations	CBIO
DEPDC5	DLBCL-PatientL	N261S	261	haematopoietic_and_lymphoid_tissue	COSMIC
DEPDC5	TCGA-B3-3925	K275*	275	kirp_tcga_mutations	CBIO
DEPDC5	TCGA-06-5413	R324fs	324	gbm_tcga_mutations	CBIO
DEPDC5	TCGA-AP-A056	R324H	324	ucec_tcga_mutations	CBIO
DEPDC5	TCGA-AP-A0LM	R347H	347	ucec_tcga_mutations	CBIO
DEPDC5	TCGA-AL-3468	L352P	352	kirp_tcga_mutations	CBIO
DEPDC5	TCGA-CZ-5985	G361_splice	361	kirc_tcga_mutations	CBIO
DEPDC5	TCGA-CN-6010	G363C	363	hnsc_tcga_mutations	CBIO
DEPDC5	PCSI_0017_Pa_P	L379F	379	pancreas	COSMIC
DEPDC5	TCGA-CG-5723	K381E	381	stad_tcga_mutations	CBIO
DEPDC5	TCGA-D3-A2JK	H405Y	405	skcm_tcga_mutations	CBIO
DEPDC5	TCGA-13-1404	F415fs	415	ov_tcga_mutations	CBIO
DEPDC5	TCGA-66-2782	G438V	438	lusc_tcga_mutations	CBIO
DEPDC5	TCGA-04-1361	S442F	442	ov_tcga_mutations	CBIO
DEPDC5	SJMB016	E448A	448	central_nervous_system	COSMIC
DEPDC5	TCGA-D1-A167	R485*	485	ucec_tcga_mutations	CBIO
DEPDC5	TCGA-BA-4077	E488D	488	hnsc_tcga_mutations	CBIO
DEPDC5	TCGA-AP-A059	V500I	500	ucec_tcga_mutations	CBIO
DEPDC5	TCGA-FS-A1ZK	S505F	505	skcm_tcga_mutations	CBIO
DEPDC5	TCGA-EE-A3JD	S548F	548	skcm_tcga_mutations	CBIO
DEPDC5	TCGA-BA-4077	E559K	559	hnsc_tcga_mutations	CBIO
DEPDC5	TCGA-ER-A19P	H567Y	567	skcm_tcga_mutations	CBIO
DEPDC5	TCGA-43-2578	G569*	569	lusc_tcga_mutations	CBIO
DEPDC5	TCGA-EE-A2MR	P572S	572	skcm_tcga_mutations	CBIO
DEPDC5	TCGA-AA-A00N	G578V	578	coadread_tcga_mutations	CBIO
DEPDC5	TCGA-GN-A266	P607S	607	skcm_tcga_mutations	CBIO
DEPDC5	TCGA-IM-A3U2	M618V	618	thca_tcga_mutations	CBIO
DEPDC5	TCGA-EE-A2GP	P625L	625	skcm_tcga_mutations	CBIO
DEPDC5	TCGA-EE-A2GU	P625S	625	skcm_tcga_mutations	CBIO
DEPDC5	GC8_T	R637*	637	stomach	COSMIC
DEPDC5	SJMB006	R637*	637	central_nervous_system	COSMIC
DEPDC5	TCGA-CR-7371	E660K	660	hnsc_tcga_mutations	CBIO
DEPDC5	TCGA-EE-A2MJ	S673F	673	skcm_tcga_mutations	CBIO
DEPDC5	TCGA-AG-A002	S692Y	692	coadread_tcga_mutations	CBIO
DEPDC5	TCGA-66-2773	S692F	692	lusc_tcga_mutations	CBIO
DEPDC5	TCGA-39-5036	M703I	703	lusc_tcga_mutations	CBIO
DEPDC5	TCGA-AP-A059	R706M	706	ucec_tcga_mutations	CBIO
DEPDC5	TCGA-CG-5721	D715G	715	stad_tcga_mutations	CBIO
DEPDC5	TCGA-05-4390	P745L	745	luad_tcga_mutations	CBIO
DEPDC5	TCGA-EE-A2MR	P770S	770	skcm_tcga_mutations	CBIO
DEPDC5	TCGA-B5-A0JR	R797C	797	ucec_tcga_mutations	CBIO
DEPDC5	TCGA-76-4929	R829*	829	gbm_tcga_mutations	CBIO
DEPDC5	TCGA-B5-A0JY	R829Q	829	ucec_tcga_mutations	CBIO
DEPDC5	TCGA-28-5219	R834*	834	gbm_tcga_mutations	CBIO
DEPDC5	HN_00190	T850M	850	upper_aerodigestive_tract	COSMIC
DEPDC5	TCGA-BR-4257	V854M	854	stad_tcga_mutations	CBIO
DEPDC5	TCGA-AX-A0J1	A875T	875	ucec_tcga_mutations	CBIO
DEPDC5	TCGA-15-0742	E902*	902	gbm_tcga_mutations	CBIO
DEPDC5	TCGA-AA-3715	K908R	908	coadread_tcga_mutations	CBIO
DEPDC5	TCGA-EE-A29T	S929F	929	skcm_tcga_mutations	CBIO
DEPDC5	TCGA-BB-7862	T951M	951	hnsc_tcga_mutations	CBIO
DEPDC5	TCGA-BS-A0TJ	R988H	988	ucec_tcga_mutations	CBIO
DEPDC5	TCGA-18-3406	D994Y	994	lusc_tcga_mutations	CBIO
DEPDC5	TCGA-37-4133	G1000E	1000	lusc_tcga_mutations	CBIO
DEPDC5	TCGA-AX-A0J1	A1002T	1002	ucec_tcga_mutations	CBIO
DEPDC5	TCGA-AP-A056	I1012M	1012	ucec_tcga_mutations	CBIO
DEPDC5	TCGA-B5-A0K3	S1013F	1013	endometrium	COSMIC
DEPDC5	Br13X	E1018*	1018	central_nervous_system	COSMIC
DEPDC5	TCGA-EE-A29E	S1033F	1033	skcm_tcga_mutations	CBIO
DEPDC5	TCGA-B5-A11R	S1033C	1033	ucec_tcga_mutations	CBIO
DEPDC5	Pa21C	S1064N	1064	pancreas	COSMIC
DEPDC5	TCGA-61-1998	K1079R	1079	ov_tcga_mutations	CBIO
DEPDC5	702TS	D1104H	1104	endometrium	COSMIC
DEPDC5	TCGA-BT-A20P	S1108R	1108	blca_tcga_mutations	CBIO
DEPDC5	05_6986	A1177V	1177	acc_mskcc_mutations	CBIO
DEPDC5	TCGA-EE-A2A2	M1195I	1195	skcm_tcga_mutations	CBIO
DEPDC5	2334199	Q1201H	1201	lung	COSMIC
DEPDC5	TCGA-BS-A0UF	F1226L	1226	ucec_tcga_mutations	CBIO
DEPDC5	TCGA-C8-A12T	K1228N	1228	brca_tcga_mutations	CBIO
DEPDC5	TCGA-32-4209	R1260H	1260	gbm_tcga_mutations	CBIO
DEPDC5	TCGA-EE-A2GO	P1278L	1278	skcm_tcga_mutations	CBIO
DEPDC5	WA39	L1285P	1285	prostate	COSMIC
DEPDC5	TCGA-AA-A01R	D1326G	1326	coadread_tcga_mutations	CBIO
DEPDC5	TCGA-CR-7392	L1336V	1336	hnsc_tcga_mutations	CBIO
DEPDC5	TCGA-BS-A0UV	S1348Y	1348	ucec_tcga_mutations	CBIO
DEPDC5	TCGA-66-2785	E1354Q	1354	lusc_tcga_mutations	CBIO
DEPDC5	TCGA-CQ-5326	K1356M	1356	hnsc_tcga_mutations	CBIO
DEPDC5	TCGA-A7-A26J	V1371D	1371	brca_tcga_mutations	CBIO
DEPDC5	TCGA-60-2712	Y1434*	1434	lusc_tcga_mutations	CBIO
DEPDC5	TCGA-AG-3892	F1461C	1461	coadread_tcga_mutations	CBIO
DEPDC5	TCGA-DU-6402	R1494W	1494	lgg_tcga_mutations	CBIO
DEPDC5	TCGA-D1-A17U	R1494Q	1494	ucec_tcga_mutations	CBIO
DEPDC5	TCGA-CG-5726	R1496W	1496	stad_tcga_mutations	CBIO
DEPDC5	TCGA-18-3416	W1517L	1517	lung	COSMIC
DEPDC5	TCGA-BR-6852	W1517*	1517	stad_tcga_mutations	CBIO
DEPDC5	TCGA-05-4395	R1528L	1528	luad_tcga_mutations	CBIO
DEPDC5	TCGA-BS-A0UV	F1545L	1545	ucec_tcga_mutations	CBIO
DEPDC5	TCGA-CG-5723	R1555W	1555	stad_tcga_mutations	CBIO
DEPDC5	TCGA-CG-5733	S1570G	1570	stad_tcga_mutations	CBIO
DEPDC5	S00827	?		lung	COSMIC
DEPDC5	S00841	?		lung	COSMIC
DEPDC5	TCGA-33-4582	?		lung	COSMIC
DEPDC5	TCGA-60-2698	?		lung	COSMIC
DEPDC5	TCGA-EJ-5527	?		prostate	COSMIC
DEPDC5	TCGA-22-1012	MUTATED		lusc_tcga_mutations	CBIO
NPRL2	NCIH1793_LUNG	Q26*	26	ccle_broad_mutations	CBIO
NPRL2	2334194	P28L	28	lung	COSMIC
NPRL2	NCIH209_LUNG	P28L	28	ccle_broad_mutations	CBIO
NPRL2	NCIH2342_LUNG	D30H	30	ccle_broad_mutations	CBIO
NPRL2	TCGA-B5-A0JY	E72K	72	ucec_tcga_mutations	CBIO
NPRL2	KELLY_AUTONOMIC_GANGLIA	R78S	78	ccle_broad_mutations	CBIO
NPRL2	HEC59_ENDOMETRIUM	R78C	78	ccle_broad_mutations	CBIO
NPRL2	TCGA-02-0003	R78C	78	gbm_tcga_mutations	CBIO
NPRL2	585208	E99*	99	lung	COSMIC
NPRL2	HEC1B_ENDOMETRIUM	A106T	106	ccle_broad_mutations	CBIO
NPRL2	16879	Y108S	108	lung	COSMIC
NPRL2	TCGA-17-Z016	Y108S	108	luad_tcga_mutations	CBIO
NPRL2	TCGA-CJ-5681	D150_splice	150	kirc_tcga_mutations	CBIO
NPRL2	TCGA-DO-A2HM	E151K	151	thca_tcga_mutations	CBIO
NPRL2	TCGA-BQ-5875	D173V	173	kirp_tcga_mutations	CBIO
NPRL2	PR-00-1165	E182V	185	prostate	COSMIC
NPRL2	TCGA-06-5859	Q188*	188	gbm_tcga_mutations	CBIO
NPRL2	SA212	F203L	203	breast	COSMIC
NPRL2	MOLP2_HAEMATOPOIETIC_AND_LYMPHOID_TISSUE	R204H	204	ccle_broad_mutations	CBIO
NPRL2	SA083	D214delD	214	breast	COSMIC
NPRL2	TCGA-B5-A11J	L228_splice	228	ucec_tcga_mutations	CBIO
NPRL2	TCGA-AP-A054	L228_splice	228	ucec_tcga_mutations	CBIO
NPRL2	RL952_ENDOMETRIUM	Y230C	230	ccle_broad_mutations	CBIO
NPRL2	TCGA-DU-6392	C246*	246	lgg_tcga_mutations	CBIO
NPRL2	TCGA-AP-A051	C246Y	246	ucec_tcga_mutations	CBIO
NPRL2	COLO679_SKIN	Q252*	252	ccle_broad_mutations	CBIO
NPRL2	KNS42_CENTRAL_NERVOUS_SYSTEM	G272R	272	ccle_broad_mutations	CBIO
NPRL2	TCGA-D1-A17R	Y285C	285	endometrium	COSMIC
NPRL2	TCGA-D1-A17B	R300H	300	ucec_tcga_mutations	CBIO
NPRL2	SNUC2A_LARGE_INTESTINE	Q303fs	303	ccle_broad_mutations	CBIO
NPRL2	NCIH929_HAEMATOPOIETIC_AND_LYMPHOID_TISSUE	R311G	311	ccle_broad_mutations	CBIO
NPRL2	TCGA-BR-6452	Y329*	329	stad_tcga_mutations	CBIO
NPRL2	HS695T_SKIN	R368Q	368	ccle_broad_mutations	CBIO
NPRL2	MHHNB11_AUTONOMIC_GANGLIA	N374D	374	ccle_broad_mutations	CBIO
NPRL2	TCGA-AG-A002	?		large_intestine	COSMIC
NPRL2	TCGA-BT-A0YX	?		urinary_tract	COSMIC
NPRL3	TCGA-EE-A2MS	S108F	108	skcm_tcga_mutations	CBIO
NPRL3	TCGA-06-0213	D111H	111	gbm_tcga_mutations	CBIO
NPRL3	TCGA-AG-A002	L123I	123	coadread_tcga_mutations	CBIO
NPRL3	TCGA-B5-A11E	L261M	261	ucec_tcga_mutations	CBIO
NPRL3	TCGA-AA-A010	E267D	267	coadread_tcga_mutations	CBIO
NPRL3	TCGA-D1-A17H	P275H	275	ucec_tcga_mutations	CBIO
NPRL3	TCGA-09-2044	S353C	353	ov_tcga_mutations	CBIO
NPRL3	TCGA-CG-4460	P423L	423	stad_tcga_mutations	CBIO
NPRL3	TCGA-AX-A06B	L490fs	490	ucec_tcga_mutations	CBIO
NPRL3	TCGA-BS-A0TE	R510H	510	ucec_tcga_mutations	CBIO
NPRL3	TCGA-AA-3982	R536W	536	coadread_tcga_mutations	CBIO

## Sheet: GATOR2
Gene	Sample ID	Mutation	Residue	Tissue	Source
MIOS	TCGA-85-6561	E14G	14	lusc_tcga_mutations	CBIO
MIOS	TCGA-CN-6024	H16R	16	hnsc_tcga_mutations	CBIO
MIOS	TCGA-D3-A2JD	S21F	21	skcm_tcga_mutations	CBIO
MIOS	TCGA-64-1676	S23*	23	luad_tcga_mutations	CBIO
MIOS	TCGA-BS-A0UV	D73E	73	ucec_tcga_mutations	CBIO
MIOS	WA57	L103F	103	prostate	COSMIC
MIOS	TCGA-AP-A056	R114Q	114	ucec_tcga_mutations	CBIO
MIOS	GC7_T	D134N	134	stomach	COSMIC
MIOS	TCGA-50-5936	E167K	167	luad_tcga_mutations	CBIO
MIOS	TCGA-D1-A168	E180*	180	endometrium	COSMIC
MIOS	TCGA-87-5896	R195*	195	gbm_tcga_mutations	CBIO
MIOS	TCGA-BR-6852	R206H	206	stad_tcga_mutations	CBIO
MIOS	HN_63058	I210M	210	upper_aerodigestive_tract	COSMIC
MIOS	TCGA-AX-A05Z	F221L	221	ucec_tcga_mutations	CBIO
MIOS	ME009T	T224I	224	skin	COSMIC
MIOS	TCGA-EE-A2MR	R239C	239	skcm_tcga_mutations	CBIO
MIOS	TCGA-35-4122	W251fs	251	luad_tcga_mutations	CBIO
MIOS	TCGA-18-5595	E257Q	257	lusc_tcga_mutations	CBIO
MIOS	TCGA-18-5592	K268N	268	lusc_tcga_mutations	CBIO
MIOS	TCGA-66-2770	R288M	288	lusc_tcga_mutations	CBIO
MIOS	TCGA-DU-6392	S290I	290	lgg_tcga_mutations	CBIO
MIOS	TCGA-CW-6087	W330*	330	kirc_tcga_mutations	CBIO
MIOS	TCGA-A5-A0VP	R345Q	345	ucec_tcga_mutations	CBIO
MIOS	TCGA-44-2657	E376Q	376	luad_tcga_mutations	CBIO
MIOS	TCGA-AG-A002	E381*	381	coadread_tcga_mutations	CBIO
MIOS	TCGA-B5-A0JY	D389Y	389	ucec_tcga_mutations	CBIO
MIOS	TCGA-17-Z046	W410L	410	luad_tcga_mutations	CBIO
MIOS	TCGA-CV-7177	P421L	421	hnsc_tcga_mutations	CBIO
MIOS	TCGA-CG-4465	G455R	455	stad_tcga_mutations	CBIO
MIOS	TCGA-05-4415	M466I	466	luad_tcga_mutations	CBIO
MIOS	TCGA-BR-6452	N555S	555	stad_tcga_mutations	CBIO
MIOS	TCGA-DU-6392	M575I	575	lgg_tcga_mutations	CBIO
MIOS	TCGA-AX-A05Z	R580Q	580	ucec_tcga_mutations	CBIO
MIOS	TCGA-50-5044	P586Q	586	luad_tcga_mutations	CBIO
MIOS	SA054	A593P	593	breast	COSMIC
MIOS	TCGA-D3-A3ML	V611N	611	skcm_tcga_mutations	CBIO
MIOS	TCGA-BT-A20J	R616T	616	blca_tcga_mutations	CBIO
MIOS	TCGA-44-6147	L629F	629	luad_tcga_mutations	CBIO
MIOS	PR-1043	D690E	690	prostate	COSMIC
MIOS	TCGA-AA-A01R	H711R	711	coadread_tcga_mutations	CBIO
MIOS	TCGA-AA-A010	F739L	739	coadread_tcga_mutations	CBIO
MIOS	TCGA-37-3783	S749L	749	lusc_tcga_mutations	CBIO
MIOS	172	P767R	767	haematopoietic_and_lymphoid_tissue	COSMIC
MIOS	TCGA-BR-6452	T773I	773	stad_tcga_mutations	CBIO
MIOS	TCGA-CV-7435	R779Q	779	hnsc_tcga_mutations	CBIO
MIOS	TCGA-DQ-5629	C785Y	785	hnsc_tcga_mutations	CBIO
MIOS	TCGA-DU-6392	M859I	859	lgg_tcga_mutations	CBIO
MIOS	TCGA-DA-A1I1	M859V	859	skcm_tcga_mutations	CBIO
SEC13	TCGA-61-2009	R43H	43	ov_tcga_mutations	CBIO
SEC13	TCGA-F1-6177	R43C	43	stad_tcga_mutations	CBIO
SEC13	PD4937a	A51T	51	breast	COSMIC
SEC13	TCGA-CG-5723	G55_splice	55	stad_tcga_mutations	CBIO
SEC13	TCGA-ER-A19P	G71R	71	skcm_tcga_mutations	CBIO
SEC13	cSCCP4	S76L	76	skin	COSMIC
SEC13	TCGA-D8-A140	W86*	86	brca_tcga_mutations	CBIO
SEC13	TCGA-44-2656	W86C	86	luad_tcga_mutations	CBIO
SEC13	TCGA-BH-A0BV	E98K	98	brca_tcga_mutations	CBIO
SEC13	TCGA-BG-A0M3	D103N	103	ucec_tcga_mutations	CBIO
SEC13	SA071	C153S	153	breast	COSMIC
SEC13	TCGA-18-3415	Q174*	174	lusc_tcga_mutations	CBIO
SEC13	TCGA-BR-4257	S212R	212	stad_tcga_mutations	CBIO
SEC13	TCGA-AP-A0LT	S212R	212	ucec_tcga_mutations	CBIO
SEC13	TCGA-DA-A1HV	D217N	217	skcm_tcga_mutations	CBIO
SEC13	PD4602a	A221T	221	NS	COSMIC
SEC13	TCGA-EE-A3JI	A221T	221	skcm_tcga_mutations	CBIO
SEC13	TCGA-AX-A0J1	R239C	239	ucec_tcga_mutations	CBIO
SEC13	TCGA-A5-A0GM	K256*	256	ucec_tcga_mutations	CBIO
SEC13	TCGA-AA-3977	L257W	257	coadread_tcga_mutations	CBIO
SEC13	TCGA-BS-A0UJ	K260R	260	ucec_tcga_mutations	CBIO
SEC13	TCGA-66-2785	G295R	295	lusc_tcga_mutations	CBIO
SEC13	TCGA-AA-A01Q	Q296*	296	coadread_tcga_mutations	CBIO
SEC13	TCGA-GL-8500	E316G	316	kirp_tcga_mutations	CBIO
SEH1L	TCGA-DU-6392	A28T	28	lgg_tcga_mutations	CBIO
SEH1L	Capan-1	D46N	46	pancreas	COSMIC
SEH1L	TCGA-DU-6392	S52R	52	lgg_tcga_mutations	CBIO
SEH1L	TCGA-BR-4280	S57G	57	stad_tcga_mutations	CBIO
SEH1L	TCGA-DS-A1OD	G71fs	71	cesc_tcga_mutations	CBIO
SEH1L	TCGA-DS-A1OC	G71fs	71	cesc_tcga_mutations	CBIO
SEH1L	TCGA-D1-A163	A75T	75	ucec_tcga_mutations	CBIO
SEH1L	TCGA-05-4420	W103C	103	luad_tcga_mutations	CBIO
SEH1L	TCGA-EE-A3JD	F121S	121	skcm_tcga_mutations	CBIO
SEH1L	TCGA-B6-A0X0	R176H	176	brca_tcga_mutations	CBIO
SEH1L	TCGA-18-3409	S259F	259	lusc_tcga_mutations	CBIO
SEH1L	TCGA-D3-A1Q6	H269Y	269	skcm_tcga_mutations	CBIO
SEH1L	TCGA-CG-5721	V292A	292	stad_tcga_mutations	CBIO
SEH1L	TCGA-AG-3892	L319F	319	coadread_tcga_mutations	CBIO
SEH1L	TCGA-EE-A2MR	Q331*	331	skcm_tcga_mutations	CBIO
SEH1L	TCGA-B5-A0JY	N336T	336	ucec_tcga_mutations	CBIO
SEH1L	TCGA-EE-A2GL	P337S	337	skcm_tcga_mutations	CBIO
SEH1L	TCGA-B5-A11H	385_386insP	385	ucec_tcga_mutations	CBIO
SEH1L	TCGA-AX-A05Z	D392N	392	ucec_tcga_mutations	CBIO
SEH1L	TCGA-BS-A0UF	R406L	406	ucec_tcga_mutations	CBIO
SEH1L	TCGA-AX-A05Z	E417D	417	ucec_tcga_mutations	CBIO
SEH1L	TCGA-66-2795	?		lung	COSMIC
WDR24	TCGA-DA-A1I0	G13S	13	skcm_tcga_mutations	CBIO
WDR24	TCGA-D1-A103	A38T	38	ucec_tcga_mutations	CBIO
WDR24	134427	E57K	57	lung	COSMIC
WDR24	TCGA-50-5933	R66H	66	luad_tcga_mutations	CBIO
WDR24	TCGA-CN-4739	R69L	69	hnsc_tcga_mutations	CBIO
WDR24	TCGA-B0-5104	R69H	69	kirc_tcga_mutations	CBIO
WDR24	TCGA-BG-A186	E87K	87	ucec_tcga_mutations	CBIO
WDR24	TCGA-BR-4361	V99M	99	stad_tcga_mutations	CBIO
WDR24	PD4107a	R109H	109	breast	COSMIC
WDR24	TCGA-EE-A3AC	H129Y	129	skcm_tcga_mutations	CBIO
WDR24	TCGA-18-3412	Q141K	141	lung	COSMIC
WDR24	TCGA-ER-A19D	S181F	181	skcm_tcga_mutations	CBIO
WDR24	TCGA-BR-6457	W191L	191	stad_tcga_mutations	CBIO
WDR24	TCGA-66-2770	D197N	197	lusc_tcga_mutations	CBIO
WDR24	TCGA-AR-A0U2	R198Q	198	brca_tcga_mutations	CBIO
WDR24	TCGA-EE-A2GO	M237I	237	skcm_tcga_mutations	CBIO
WDR24	20	R241H	241	haematopoietic_and_lymphoid_tissue	COSMIC
WDR24	TCGA-CV-7245	A252T	252	hnsc_tcga_mutations	CBIO
WDR24	TCGA-CF-A1HS	E262K	262	blca_tcga_mutations	CBIO
WDR24	Br06X	R264C	264	central_nervous_system	COSMIC
WDR24	TCGA-A5-A0GB	A291V	291	endometrium	COSMIC
WDR24	TCGA-D1-A15X	T301M	301	ucec_tcga_mutations	CBIO
WDR24	TCGA-EE-A29B	G441D	441	skcm_tcga_mutations	CBIO
WDR24	TCGA-D3-A3C1	E577K	577	skcm_tcga_mutations	CBIO
WDR24	TCGA-E9-A1RF	V696fs	696	brca_tcga_mutations	CBIO
WDR24	TCGA-AP-A059	L715M	715	ucec_tcga_mutations	CBIO
WDR59	TCGA-DS-A0VL	V32L	32	cesc_tcga_mutations	CBIO
WDR59	TCGA-AX-A0J1	R36H	36	ucec_tcga_mutations	CBIO
WDR59	TCGA-39-5031	F38L	38	lusc_tcga_mutations	CBIO
WDR59	TCGA-ER-A193	N43S	43	skcm_tcga_mutations	CBIO
WDR59	TCGA-BS-A0UF	R52Q	52	ucec_tcga_mutations	CBIO
WDR59	TCGA-B3-4104	H70Y	70	kirp_tcga_mutations	CBIO
WDR59	TCGA-FY-A3I5	A78V	78	thca_tcga_mutations	CBIO
WDR59	TCGA-AA-A01R	A114V	114	coadread_tcga_mutations	CBIO
WDR59	TCGA-02-0055	N157K	157	gbm_tcga_mutations	CBIO
WDR59	TCGA-ER-A195	D171V	171	skcm_tcga_mutations	CBIO
WDR59	TCGA-CG-4306	I174M	174	stad_tcga_mutations	CBIO
WDR59	TCGA-05-4382	R178_splice	178	luad_tcga_mutations	CBIO
WDR59	TCGA-EE-A20C	H195Y	195	skcm_tcga_mutations	CBIO
WDR59	TCGA-AO-A0J9	H205Y	205	breast	COSMIC
WDR59	TCGA-ER-A19P	R307G	307	skcm_tcga_mutations	CBIO
WDR59	TCGA-64-5781	Q319H	319	luad_tcga_mutations	CBIO
WDR59	TCGA-AP-A059	A360T	360	ucec_tcga_mutations	CBIO
WDR59	TCGA-AX-A0J0	E370*	370	ucec_tcga_mutations	CBIO
WDR59	TCGA-22-5473	P372S	372	lusc_tcga_mutations	CBIO
WDR59	TCGA-EE-A2GR	P373S	373	skcm_tcga_mutations	CBIO
WDR59	631064	R414T	414	lung	COSMIC
WDR59	TCGA-FS-A1ZT	R426C	426	skcm_tcga_mutations	CBIO
WDR59	TCGA-17-Z022	M429I	429	luad_tcga_mutations	CBIO
WDR59	TCGA-13-1408	P509S	509	ov_tcga_mutations	CBIO
WDR59	TCGA-CG-4444	R521W	521	stad_tcga_mutations	CBIO
WDR59	TCGA-AP-A0LN	R521Q	521	ucec_tcga_mutations	CBIO
WDR59	TCGA-EE-A3JB	P535L	535	skcm_tcga_mutations	CBIO
WDR59	TCGA-BS-A0TE	G546R	546	ucec_tcga_mutations	CBIO
WDR59	1342576	M559I	559	breast	COSMIC
WDR59	TCGA-EE-A3J5	R561W	561	skcm_tcga_mutations	CBIO
WDR59	TCGA-F1-6177	R590C	590	stad_tcga_mutations	CBIO
WDR59	TCGA-B5-A11U	S601N	601	ucec_tcga_mutations	CBIO
WDR59	TCGA-22-5472	R606L	606	lusc_tcga_mutations	CBIO
WDR59	TCGA-AX-A0J0	R622W	622	ucec_tcga_mutations	CBIO
WDR59	272	K630R	630	haematopoietic_and_lymphoid_tissue	COSMIC
WDR59	TCGA-AP-A0LM	R639Q	639	ucec_tcga_mutations	CBIO
WDR59	TCGA-17-Z045	Q650H	650	luad_tcga_mutations	CBIO
WDR59	TCGA-AP-A0LE	P657S	657	ucec_tcga_mutations	CBIO
WDR59	TCGA-D3-A1Q4	I667R	667	skcm_tcga_mutations	CBIO
WDR59	TCGA-AP-A059	Q727H	727	ucec_tcga_mutations	CBIO
WDR59	TCGA-CH-5738	P762T	762	prad_tcga_mutations	CBIO
WDR59	TCGA-EE-A2GO	P769S	769	skcm_tcga_mutations	CBIO
WDR59	TCGA-24-2271	A807V	807	ov_tcga_mutations	CBIO
WDR59	TCGA-55-6642	R837S	837	luad_tcga_mutations	CBIO
WDR59	TCGA-05-4396	R837S	837	luad_tcga_mutations	CBIO
WDR59	PD3998a	R839Q	839	breast	COSMIC
WDR59	TCGA-44-3396	R839*	839	luad_tcga_mutations	CBIO
WDR59	TCGA-61-2095	E881G	881	ov_tcga_mutations	CBIO
WDR59	TCGA-EM-A2P2	L883V	883	thca_tcga_mutations	CBIO
WDR59	TCGA-EE-A2M5	S887F	887	skcm_tcga_mutations	CBIO
WDR59	TCGA-BR-4280	K918R	918	stad_tcga_mutations	CBIO
WDR59	TCGA-EE-A29E	R955W	955	skcm_tcga_mutations	CBIO
WDR59	TCGA-66-2770	?		lung	COSMIC

## Sheet: LAMTORs
Gene	Sample ID	Mutation	Residue	Tissue	Source
LAMTOR1	TCGA-DR-A0ZM	E8D	8	cesc_tcga_mutations	CBIO
LAMTOR1	ESO-131	R19W	19	oesophagus	COSMIC
LAMTOR1	TCGA-CM-6162-01	R19W	19	large_intestine	COSMIC
LAMTOR1	TCGA-13-0919	S69T	69	ov_tcga_mutations	CBIO
LAMTOR1	TCGA-13-0717	S69T	69	ov_tcga_mutations	CBIO
LAMTOR1	TCGA-CR-7376	D149V	149	hnsc_tcga_mutations	CBIO
LAMTOR2	TCGA-BH-A0B5	T16A	16	brca_tcga_mutations	CBIO
LAMTOR2	TCGA-AG-A002	A33S	33	coadread_tcga_mutations	CBIO
LAMTOR2	TCGA-28-2499	A46V	46	gbm_tcga_mutations	CBIO
LAMTOR2	TCGA-AK-3430	N51T	51	kirc_tcga_mutations	CBIO
LAMTOR2	TCGA-49-6743	Y56fs	56	luad_tcga_mutations	CBIO
LAMTOR2	TCGA-05-4396	G60W	60	luad_tcga_mutations	CBIO
LAMTOR2	TCGA-BH-A0BR	E66fs	66	brca_tcga_mutations	CBIO
LAMTOR2	SA218	R80C	80	breast	COSMIC
LAMTOR2	TCGA-AZ-5403-01	R85*	85	large_intestine	COSMIC
LAMTOR2	TCGA-33-4583	A95D	95	lusc_tcga_mutations	CBIO
LAMTOR2	TCGA-DR-A0ZM	E116K	116	cesc_tcga_mutations	CBIO
LAMTOR2	TCGA-EE-A2GJ	L119F	119	skcm_tcga_mutations	CBIO
LAMTOR3	TCGA-BA-5558	G29R	29	hnsc_tcga_mutations	CBIO
LAMTOR3	TCGA-AZ-4315-01	R46*	46	large_intestine	COSMIC
LAMTOR3	TCGA-D1-A17R-01A-11D-A12J-09	A56V	56	endometrium	COSMIC
LAMTOR3	TCGA-76-4925	V80_splice	80	gbm_tcga_mutations	CBIO
LAMTOR3	TCGA-DU-6392	R85C	85	lgg_tcga_mutations	CBIO
LAMTOR3	LUAD-B00859	S105I	105	lung	COSMIC
LAMTOR4	TCGA-G7-7501	M1fs	1	kirp_tcga_mutations	CBIO
LAMTOR4	TCGA-CV-7427	S30F	30	hnsc_tcga_mutations	CBIO
LAMTOR4	TCGA-AA-A022	E72fs	72	coadread_tcga_mutations	CBIO
LAMTOR4	TCGA-64-5775	MUTATED		luad_tcga_mutations	CBIO
LAMTOR5	TCGA-EL-A3N2	S15N	15	thca_tcga_mutations	CBIO
LAMTOR5	TCGA-D3-A3C7	P45S	45	skcm_tcga_mutations	CBIO
LAMTOR5	TCGA-66-2793	C63F	63	lusc_tcga_mutations	CBIO
LAMTOR5	TCGA-HL-7533	S79L	79	hnsc_tcga_mutations	CBIO
LAMTOR5	TCGA-B0-5106	I100T	100	kirc_tcga_mutations	CBIO
LAMTOR5	TCGA-AA-3864	R116H	116	coadread_tcga_mutations	CBIO
LAMTOR5	TCGA-AA-3542	V129D	129	coadread_tcga_mutations	CBIO
LAMTOR5	TCGA-B5-A11Y	G154E	154	ucec_tcga_mutations	CBIO
LAMTOR5	TCGA-09-2049	H169N	169	ov_tcga_mutations	CBIO
LAMTOR5	TCGA-CG-5733	*174W	174	stad_tcga_mutations	CBIO

## Sheet: MAPKAP1
Gene	Sample ID	Mutation	Residue	Tissue	Source
MAPKAP1	TCGA-AX-A05Z	R15Q	15	ucec_tcga_mutations	CBIO
MAPKAP1	TCGA-BR-4184	V30I	30	stad_tcga_mutations	CBIO
MAPKAP1	TCGA-34-5928	L31V	31	lusc_tcga_mutations	CBIO
MAPKAP1	TCGA-AA-3947	D37G	37	coadread_tcga_mutations	CBIO
MAPKAP1	TCGA-05-4390	G59C	59	luad_tcga_mutations	CBIO
MAPKAP1	TCGA-23-1110	R81T	81	ov_tcga_mutations	CBIO
MAPKAP1	TCGA-EE-A29D	S84L	84	skcm_tcga_mutations	CBIO
MAPKAP1	TCGA-AP-A0LM	R94Q	94	ucec_tcga_mutations	CBIO
MAPKAP1	TCGA-BG-A0LX	R94Q	94	ucec_tcga_mutations	CBIO
MAPKAP1	TCGA-22-1011	I101M	101	lusc_tcga_mutations	CBIO
MAPKAP1	TCGA-F1-6177	R145C	145	stad_tcga_mutations	CBIO
MAPKAP1	TCGA-33-4547	S161C	161	lusc_tcga_mutations	CBIO
MAPKAP1	TCGA-BH-A1ES	Y180C	180	brca_tcga_mutations	CBIO
MAPKAP1	TCGA-05-4396	G208W	208	luad_tcga_mutations	CBIO
MAPKAP1	S00944	T215I	215	lung	COSMIC
MAPKAP1	TCGA-05-4397	S216I	216	luad_tcga_mutations	CBIO
MAPKAP1	TCGA-05-4396	R219L	219	luad_tcga_mutations	CBIO
MAPKAP1	OV207	H233Y	233	ovary	COSMIC
MAPKAP1	TCGA-AA-A022	R282Q	282	coadread_tcga_mutations	CBIO
MAPKAP1	TCGA-05-4427	L291I	291	luad_tcga_mutations	CBIO
MAPKAP1	TCGA-D1-A177	R311Q	311	ucec_tcga_mutations	CBIO
MAPKAP1	TCGA-AR-A256	D360G	360	brca_tcga_mutations	CBIO
MAPKAP1	TCGA-13-1509	D412G	412	ov_tcga_mutations	CBIO
MAPKAP1	TCGA-63-6202	S449I	449	lusc_tcga_mutations	CBIO
MAPKAP1	TCGA-AP-A0LM	T456M	456	ucec_tcga_mutations	CBIO
MAPKAP1	113368	R458L	458	lung	COSMIC
MAPKAP1	TCGA-EE-A181	K501E	501	skcm_tcga_mutations	CBIO
MAPKAP1	TCGA-ER-A19P	G520R	520	skcm_tcga_mutations	CBIO

## Sheet: MLST8
Gene	Sample ID	Mutation	Residue	Tissue	Source
MLST8	TCGA-A6-5665-01	M1T	1	large_intestine	COSMIC
MLST8	TCGA-BL-A3JM-01A-12D-A21A-08	R25G	25	urinary_tract	COSMIC
MLST8	TCGA-DK-A2I1-01A-11D-A17V-08	R36Q	36	urinary_tract	COSMIC
MLST8	TCGA-D1-A16X	N73T	73	ucec_tcga_mutations	CBIO
MLST8	ME029T	P75S	75	skin	COSMIC
MLST8	TCGA-AG-A002	K86N	86	coadread_tcga_mutations	CBIO
MLST8	TCGA-76-6283	T102M	102	gbm_tcga_mutations	CBIO
MLST8	587224	T108I	108	large_intestine	COSMIC
MLST8	TCGA-06-1806	W112fs	112	gbm_tcga_mutations	CBIO
MLST8	TCGA-66-2785	S116F	116	lusc_tcga_mutations	CBIO
MLST8	TCGA-DU-6392	T200M	200	lgg_tcga_mutations	CBIO
MLST8	TCGA-BR-4184	A223T	223	stad_tcga_mutations	CBIO
MLST8	587332	A223T	223	large_intestine	COSMIC
MLST8	102T	Q225H	225	thyroid	COSMIC
MLST8	TCGA-AP-A051	T233_splice	233	ucec_tcga_mutations	CBIO
MLST8	TCGA-D1-A103	R248M	248	ucec_tcga_mutations	CBIO
MLST8	TCGA-FS-A1ZZ	W297*	297	skcm_tcga_mutations	CBIO
MLST8	TCGA-67-6216	H311Y	311	luad_tcga_mutations	CBIO
MLST8	TCGA-13-0760	Q312R	312	ov_tcga_mutations	CBIO
MLST8	TCGA-AA-3715	MUTATED		coadread_tcga_mutations	CBIO

## Sheet: PRR5-PRR5L
Gene	Sample ID	Mutation	Residue	Tissue	Source
PRR5L	TCGA-EE-A3AA	P7L	7	skcm_tcga_mutations	CBIO
PRR5	TCGA-A8-A06O	Q8K	8	brca_tcga_mutations	CBIO
PRR5L	S00932	V11F	11	lung	COSMIC
PRR5L	TCGA-EE-A2MD	S51L	51	skcm_tcga_mutations	CBIO
PRR5L	TCGA-AP-A059	S55I	55	ucec_tcga_mutations	CBIO
PRR5L	TCGA-D3-A2JD	E73K	73	skcm_tcga_mutations	CBIO
PRR5L	TCGA-A6-2672	E79K	79	coadread_tcga_mutations	CBIO
PRR5L	TCGA-04-1343	L89H	89	ov_tcga_mutations	CBIO
PRR5L	TCGA-22-5485	D95N	95	lusc_tcga_mutations	CBIO
PRR5	TCGA-22-5473-01A-01D-1632-08	E117D	117	lung	COSMIC
PRR5L	TCGA-AA-3685	R121C	121	coadread_tcga_mutations	CBIO
PRR5L	TCGA-BR-6852	Q148R	148	stad_tcga_mutations	CBIO
PRR5L	S00936	R155H	155	lung	COSMIC
PRR5L	TCGA-DR-A0ZM	H198Y	198	cesc_tcga_mutations	CBIO
PRR5L	TCGA-A4-8098	H198Y	198	kirp_tcga_mutations	CBIO
PRR5L	TCGA-DR-A0ZM-01A-12D-A10S-08	H198Y	198	cervix	COSMIC
PRR5	Br27P	R199H	199	central_nervous_system	COSMIC
PRR5L	TCGA-A2-A0CX	V218I	218	brca_tcga_mutations	CBIO
PRR5L	TCGA-EE-A2GL	P220S	220	skcm_tcga_mutations	CBIO
PRR5L	TCGA-AX-A05Z	R228H	228	ucec_tcga_mutations	CBIO
PRR5L	TCGA-CV-7095	S231*	231	hnsc_tcga_mutations	CBIO
PRR5L	TCGA-AA-3811	P233L	233	coadread_tcga_mutations	CBIO
PRR5L	TCGA-B5-A0JZ	R245Q	245	ucec_tcga_mutations	CBIO
PRR5	TCGA-17-Z001	Y255F	255	luad_tcga_mutations	CBIO
PRR5L	TCGA-EE-A3J7	S255F	255	skcm_tcga_mutations	CBIO
PRR5	TCGA-CR-7402	A271E	271	hnsc_tcga_mutations	CBIO
PRR5	TCGA-D1-A163	A271V	271	ucec_tcga_mutations	CBIO
PRR5L	TCGA-73-4666	L281fs	281	luad_tcga_mutations	CBIO
PRR5L	TCGA-AG-A02N	T291M	291	coadread_tcga_mutations	CBIO
PRR5L	TCGA-CD-5802	P326T	326	stad_tcga_mutations	CBIO
PRR5L	TCGA-BG-A0MQ-01A-11D-A10B-09	R334Q	334	endometrium	COSMIC
PRR5	TCGA-CG-4460	P345L	345	stad_tcga_mutations	CBIO
PRR5L	TCGA-EE-A3AF	D347G	347	skcm_tcga_mutations	CBIO
PRR5	TCGA-EE-A2MS	S355F	355	skcm_tcga_mutations	CBIO
PRR5L	TCGA-38-4626	*369L	369	luad_tcga_mutations	CBIO
PRR5	TCGA-43-6771	R371L	371	lusc_tcga_mutations	CBIO
PRR5	TCGA-18-3419	Q385H	385	lusc_tcga_mutations	CBIO
PRR5	TCGA-D1-A176	Q385*	385	ucec_tcga_mutations	CBIO
PRR5	TCGA-DU-6392	MUTATED		lgg_tcga_mutations	CBIO
PRR5	TCGA-05-4249-01A-01D-1105-08	?		lung	COSMIC
PRR5	TCGA-50-5941-01A-11D-1753-08	?		lung	COSMIC

## Sheet: RRAGs
Gene	Sample ID	Mutation	Residue	Tissue	Source
RRAGA	TCGA-AD-5900-01	R38C	38	large_intestine	COSMIC
RRAGA	TCGA-D1-A167	W61C	61	ucec_tcga_mutations	CBIO
RRAGA	TCGA-HT-8011	D62Y	62	lgg_tcga_mutations	CBIO
RRAGA	587376	I89M	89	large_intestine	COSMIC
RRAGA	TCGA-AP-A056	F92S	92	ucec_tcga_mutations	CBIO
RRAGA	TCGA-D1-A16X	E98K	98	ucec_tcga_mutations	CBIO
RRAGA	TCGA-A5-A0GH	D130E	130	ucec_tcga_mutations	CBIO
RRAGA	TCGA-BS-A0UV	R153H	153	ucec_tcga_mutations	CBIO
RRAGA	TCGA-06-0214	W165R	165	gbm_tcga_mutations	CBIO
RRAGA	TCGA-G2-A2EJ-01A-11D-A17V-08	E221Q	221	urinary_tract	COSMIC
RRAGA	TCGA-19-5955	E229K	229	gbm_tcga_mutations	CBIO
RRAGA	TCGA-29-1781-01	S257T	257	ovary	COSMIC
RRAGA	TCGA-DU-6392	M273V	273	lgg_tcga_mutations	CBIO
RRAGA	TCGA-CR-6478	P279L	279	hnsc_tcga_mutations	CBIO
RRAGA	ESO-610	R313H	313	oesophagus	COSMIC
RRAGB	TCGA-44-7670-01	E3K	3	lung	COSMIC
RRAGB	TCGA-BQ-7051	D5N	5	kirp_tcga_mutations	CBIO
RRAGB	585276	D20Y	20	lung	COSMIC
RRAGB	LC_S29	D20N	20	lung	COSMIC
RRAGB	TCGA-D1-A17Q	K42Q	42	ucec_tcga_mutations	CBIO
RRAGB	PD4103a	A62V	62	breast	COSMIC
RRAGB	TCGA-D1-A15X	A62T	62	ucec_tcga_mutations	CBIO
RRAGB	587220	R71H	71	large_intestine	COSMIC
RRAGB	TCGA-AD-6895-01	S88R	88	large_intestine	COSMIC
RRAGB	TCGA-B5-A0JR	S109P	109	ucec_tcga_mutations	CBIO
RRAGB	LUAD-B00859	H110Y	110	lung	COSMIC
RRAGB	TCGA-BT-A20R-01A-12D-A16O-08	R112L	112	urinary_tract	COSMIC
RRAGB	LUAD_E01086	V118L	118	lung	COSMIC
RRAGB	TCGA-55-6987-01	L119F	119	lung	COSMIC
RRAGB	TCGA-DU-6392	F130V	130	lgg_tcga_mutations	CBIO
RRAGB	TCGA-BR-4362	R139Q	139	stad_tcga_mutations	CBIO
RRAGB	TCGA-BR-6852	R144L	144	stad_tcga_mutations	CBIO
RRAGB	TCGA-B5-A11N	L149M	149	ucec_tcga_mutations	CBIO
RRAGB	TCGA-AR-A1AR	Y166fs	166	brca_tcga_mutations	CBIO
RRAGB	TCGA-D1-A103	S178Y	178	ucec_tcga_mutations	CBIO
RRAGB	TCGA-D1-A17Q	L192M	192	ucec_tcga_mutations	CBIO
RRAGB	TCGA-A5-A0GB	E195D	195	ucec_tcga_mutations	CBIO
RRAGB	TCGA-AP-A0LM	E204K	204	ucec_tcga_mutations	CBIO
RRAGB	TCGA-05-4427	W226C	226	luad_tcga_mutations	CBIO
RRAGB	TCGA-GV-A3QI-01A-11D-A21Z-08	E228*	228	urinary_tract	COSMIC
RRAGB	587332	T229A	229	large_intestine	COSMIC
RRAGB	ESO-250	W234C	234	oesophagus	COSMIC
RRAGB	TCGA-69-7973-01	E249*	249	lung	COSMIC
RRAGB	TCGA-AA-A01Q	N251S	251	coadread_tcga_mutations	CBIO
RRAGB	TCGA-AA-3510-01	S276Y	276	large_intestine	COSMIC
RRAGB	TCGA-AX-A0J0	S276Y	276	ucec_tcga_mutations	CBIO
RRAGB	P06-1125	C280Y	280	prostate	COSMIC
RRAGB	TCGA-AA-A010	R284C	284	coadread_tcga_mutations	CBIO
RRAGB	TCGA-CA-6717-01	R288I	288	large_intestine	COSMIC
RRAGB	TCGA-AP-A0LM	R288I	288	ucec_tcga_mutations	CBIO
RRAGB	TCGA-A6-6781-01	P340L	340	large_intestine	COSMIC
RRAGB	TCGA-CV-7248	R352S	352	hnsc_tcga_mutations	CBIO
RRAGB	TCGA-AA-A01D	D365H	365	coadread_tcga_mutations	CBIO
RRAGB	TCGA-AA-3715	G366E	366	coadread_tcga_mutations	CBIO
RRAGB	TCGA-69-7980-01	R374P	374	lung	COSMIC
RRAGB	8012854	?	?	pancreas	COSMIC
RRAGB	ICGC_0029	?	?	pancreas	COSMIC
RRAGC	TCGA-AA-A01R	G56fs	56	coadread_tcga_mutations	CBIO
RRAGC	TCGA-B5-A11E	D102G	102	ucec_tcga_mutations	CBIO
RRAGC	LPJ023	P118L	118	haematopoietic_and_lymphoid_tissue	COSMIC
RRAGC	TCGA-69-7978-01	P118A	118	lung	COSMIC
RRAGC	TCGA-44-6778	M121V	121	luad_tcga_mutations	CBIO
RRAGC	TCGA-BA-4075	M121R	121	hnsc_tcga_mutations	CBIO
RRAGC	TCGA-AG-A002	D125Y	125	coadread_tcga_mutations	CBIO
RRAGC	TCGA-EE-A3AA	P126K	126	skcm_tcga_mutations	CBIO
RRAGC	TCGA-EE-A3AB	G136R	136	skcm_tcga_mutations	CBIO
RRAGC	TCGA-55-8089-01	G138V	138	lung	COSMIC
RRAGC	LUAD-S01345	S162F	162	lung	COSMIC
RRAGC	TCGA-CM-6164-01	Y165H	165	large_intestine	COSMIC
RRAGC	TCGA-13-0905	Y165C	165	ov_tcga_mutations	CBIO
RRAGC	TCGA-BS-A0UV	D170Y	170	ucec_tcga_mutations	CBIO
RRAGC	TCGA-CM-4743-01	I189fs*1	189	large_intestine	COSMIC
RRAGC	TCGA-DU-6392	Q192H	192	lgg_tcga_mutations	CBIO
RRAGC	TCGA-CJ-4869-01	D202G	202	kidney	COSMIC
RRAGC	TCGA-AP-A056	D202G	202	ucec_tcga_mutations	CBIO
RRAGC	TCGA-BS-A0UJ	L217R	217	ucec_tcga_mutations	CBIO
RRAGC	TCGA-CJ-4904	S230I	230	kirc_tcga_mutations	CBIO
RRAGC	TCGA-DI-A0WH	S252_splice	252	ucec_tcga_mutations	CBIO
RRAGC	TCGA-CN-6022	N253_splice	253	hnsc_tcga_mutations	CBIO
RRAGC	TCGA-44-7670-01	D263Y	263	lung	COSMIC
RRAGC	587284	K333N	333	large_intestine	COSMIC
RRAGC	LUAD-B01811	G370C	370	lung	COSMIC
RRAGC	TCGA-AA-3977	R396Q	396	coadread_tcga_mutations	CBIO
RRAGC	TCGA-BS-A0UF	R396Q	396	ucec_tcga_mutations	CBIO
RRAGC	TCGA-60-2713	MUTATED		lusc_tcga_mutations	CBIO
RRAGD	Br27P	P8L	8	central_nervous_system	COSMIC
RRAGD	TCGA-BR-6802	E22del	22	stad_tcga_mutations	CBIO
RRAGD	TCGA-AP-A0LM	S87Y	87	ucec_tcga_mutations	CBIO
RRAGD	TCGA-CV-6933	C101*	101	hnsc_tcga_mutations	CBIO
RRAGD	TCGA-05-4396	R102L	102	luad_tcga_mutations	CBIO
RRAGD	TCGA-BH-A1FC	R102Q	102	brca_tcga_mutations	CBIO
RRAGD	TCGA-05-4396	P119Q	119	luad_tcga_mutations	CBIO
RRAGD	TCGA-BA-6872	I134N	134	hnsc_tcga_mutations	CBIO
RRAGD	TCGA-05-4396	R136L	136	luad_tcga_mutations	CBIO
RRAGD	TCGA-D1-A103	K180T	180	ucec_tcga_mutations	CBIO
RRAGD	TCGA-AP-A0LM	D202N	202	ucec_tcga_mutations	CBIO
RRAGD	2334199	S220T	220	lung	COSMIC
RRAGD	TCGA-95-7039-01	Y222N	222	lung	COSMIC
RRAGD	TCGA-23-1022	I226V	226	ov_tcga_mutations	CBIO
RRAGD	TCGA-05-4420	P242L	242	luad_tcga_mutations	CBIO
RRAGD	TCGA-A8-A08P	E245G	245	brca_tcga_mutations	CBIO
RRAGD	TCGA-D1-A17Q	I269F	269	ucec_tcga_mutations	CBIO
RRAGD	TCGA-BS-A0UV	V326M	326	ucec_tcga_mutations	CBIO
RRAGD	TCGA-AA-3558	R349I	349	coadread_tcga_mutations	CBIO
RRAGD	TCGA-AZ-4315-01	H358N	358	large_intestine	COSMIC
RRAGD	TCGA-A6-5662-01	R361P	361	large_intestine	COSMIC
RRAGD	TCGA-AU-3779-01	R361Q	361	large_intestine	COSMIC
RRAGD	TCGA-AZ-5407-01	R361W	361	large_intestine	COSMIC
RRAGD	TCGA-D5-6535-01	R361W	361	large_intestine	COSMIC
RRAGD	TCGA-D5-6538-01	R361W	361	large_intestine	COSMIC
RRAGD	TCGA-13-2060	R361W	361	ov_tcga_mutations	CBIO
RRAGD	TCGA-BS-A0UF	S377Y	377	ucec_tcga_mutations	CBIO
RRAGD	587376	R378*	378	large_intestine	COSMIC
RRAGD	TCGA-B5-A11E	R383W	383	ucec_tcga_mutations	CBIO
RRAGD	TCGA-AX-A0J1	A390V	390	ucec_tcga_mutations	CBIO
RRAGD	LUAD-NYU574S	?	?

[truncated: 6 more sheets: RHEB-RHEBL1, RICTOR, RPTOR, TBC1D7, TSC1, TSC2]
