# Supplementary material for: A Diverse Array of Cancer-Associated MTOR Mutations Are Hyperactivating and Can Predict Rapamycin Sensitivity
Source: Oxford University Press journal article supplement (doi:10.1158/2159-8290.cd-13-0929), 2014-03-14
Supplement: 21598290cd130929-sup-table_s3.xlsx [file 21598290cd130929-sup-table_s3.xlsx]

## Sheet: Sheet3
Urano et al.			This study
S. pombe Tor2 activating mutation	Equivalent postion in H. sapiens mTOR	Homolog evaluated in H. sapiens mTOR	Samples w/ mutaion	Type	Mutation
Q1206L	Q1355
A1280V	A1429
Q1289P	K1438
W1299R	W1449
A1309V/P	A1459		TCGA-BP-5176	Tumor	A1459P
L1310P	L1460	Yes	TCGA-BP-5175	Tumor	L1460P
			TCGA-B0-5701	Tumor	L1460P
C1333F	C1483		TCGA-BP-5007	Tumor	C1483F
			TCGA-CJ-4907	Tumor	C1483F
			Megalencaphaly, Smith et al	Disease	C1483F
			TCGA-06-0747	Tumor	C1483R
			BR-M-059	Tumor	C1483W
			MOLT16	Cell Line	C1483Y
			Hemimegalencephaly, Lee et al	Disease	C1483Y
			TCGA-B0-5696	Tumor	C1483Y
A1427T/V	A1577		TCGA-AZ-4615	Tumor	A1577V
V1740F	V1938		LOVO	Cell Line	V1938_splice
V1775F	I1973		TCGA-E2-A15O	Tumor	I1973F
			TCGA-B0-5100	Tumor	I1973F
Y1986C	F2184
V2000L	V2198
F2004C	F2202
V2205F	V2403
A2218G	A2416
E2221K	E2419	Yes	Bladder Patient, Wagle et al	Tumor	E2419K
I2229T	L2427		LC_C33	Tumor	L2427Q
			TCGA-06-0122	Tumor	L2427Q
			ST486	Cell Line	L2427R
			TCGA-KN-8437	Tumor	L2427R
L2233H	L2431		001	Tumor	L2431P
L2289F	I2501
N2294I	D2506
