# Supplementary material for: A Diverse Array of Cancer-Associated MTOR Mutations Are Hyperactivating and Can Predict Rapamycin Sensitivity
Source: Oxford University Press journal article supplement (doi:10.1158/2159-8290.cd-13-0929), 2014-03-14
Supplement: 21598290cd130929-sup-table_s4.xlsx [file 21598290cd130929-sup-table_s4.xlsx]

## Sheet: Sheet1
Mutation	Residue	Level of Activity	Figure(s)
A41P	41		N.S.
A41S	41		N.S.
A41T	41		N.S.
R1208C	1208		S5
A1428T	1428	+	2
L1433S	1433	++	2
K1452N	1452		2
A1459P	1459	+++	2
L1460P	1460	+++	2
Y1463S	1463		2
C1483F	1483	++	2, S3
C1483R	1483	++	3
C1483W	1483	++	3
C1483Y	1483	++	2, S3
E1485K	1485		2
A1519T	1519	+	2
F1888I	1888	++	N.S.
F1888L	1888	++	2
F1888V	1888		N.S.
I1973F	1973	++	N.S.
T1977K	1977	++	N.S.
T1977R	1977	+++	2
T1977S	1977		N.S.
V2006F	2006	++	N.S.
V2006I	2006	++	2
V2006L	2006
A2100T	2100		N.S.
R2134L	2134		N.S.
R2152C	2152		S3
L2172M	2172	+	N.S.
D2191H	2191	+	N.S.
R2193C	2193	+	N.S.
N2206S	2206	+	S3
L2209V	2209	+++	S3
A2210P	2210	+	S3
P2213L	2213		S3
S2215F	2215	+++	S3
S2215P	2215	+++	S3
S2215Y	2215	+++	2
S2215T	2215		S3
L2216P	2216	+	S3
R2217W	2217	+	S3
L2220F	2220	++	S3
Q2223K	2223	++	S3
A2226S	2226	+	S3
I2228T	2228		N.S.
L2230V	2230	+	N.S.
S2231W	2231	+	N.S.
T2232I	2232	+	N.S.
L2236H	2236		N.S.
G2238D	2238		N.S.
L2334V	2334		N.S.
E2419K	2419	++	N.S.
R2430M	2430		S5
L2431P	2431	++	S3
I2500F	2500	+	2
I2500M	2500	+	S3
R2505P	2505	++	2
R2505Q	2505		N.S.
R2505*	2505		N.S.
D2512H	2512	+	2
D2512G	2512		N.S.
D2512Y	2512		N.S.
